# Supplementary material
Source: MDPI journal article supplement (https://www.mdpi.com/2076-3417/11/13/6137)
Supplement: s1 [file s1]

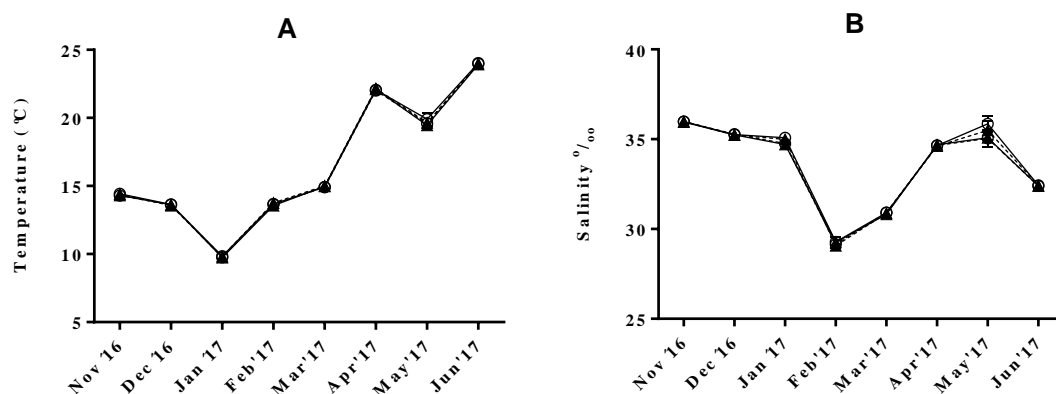

**Figure S1.** Seasonal variation A) Water Temperature and B) Water Salinity of *Ulva rigida* tanks produced by IMTA under different conditions of flow rate, high (○) and low (▲), and of stocking density, high (full lines) and low (dotted lines). Standard deviations are represented as bars (n = 3, in triplicate).

**Table S1:** Recommended Daily Intakes (%) and Recommended Daily Allowances (g/day) for macro- and microminerals of dry *Ulva. rigida* produced by IMTA under different conditions of flow rate, high (H<sub>Fr</sub>) and low (L<sub>Fr</sub>), and of stocking density, high (H<sub>Sd</sub>) and low (L<sub>Sd</sub>).

| Mineral | Condition                        | Summer 16' |             | Autumn 16' |             | Winter 17' |             | Spring 17' |             |
|---------|----------------------------------|------------|-------------|------------|-------------|------------|-------------|------------|-------------|
|         |                                  | % RDI      | RDA (g/day) |
| Na      | L <sub>Fr</sub> /L <sub>Sd</sub> | 15.0       | 61.5        | 14.8       | 62.2        | 16.1       | 57.1        | 18.3       | 50.2        |
|         | H <sub>Fr</sub> /L <sub>Sd</sub> | 16.0       | 57.7        | 15.1       | 61.7        | 15.9       | 58.1        | 18.8       | 49.1        |
|         | L <sub>Fr</sub> /H <sub>Sd</sub> | 15.1       | 60.9        | 15.1       | 61.3        | 16.1       | 57.3        | 17.1       | 53.8        |
|         | H <sub>Fr</sub> /H <sub>Sd</sub> | 15.0       | 61.4        | 14.4       | 64.2        | 15.2       | 60.7        | 18.6       | 49.5        |
| K       | L <sub>Fr</sub> /L <sub>Sd</sub> | 5.6        |             | 4.6        |             | 6.7        |             | 7.2        |             |
|         | H <sub>Fr</sub> /L <sub>Sd</sub> | 6.1        |             | 5.2        |             | 6.1        |             | 6.5        |             |
|         | L <sub>Fr</sub> /H <sub>Sd</sub> | 5.2        |             | 5.2        |             | 5.8        |             | 5.6        |             |
|         | H <sub>Fr</sub> /H <sub>Sd</sub> | 6.4        |             | 4.5        |             | 5.7        |             | 6.1        |             |
| Ca      | L <sub>Fr</sub> /L <sub>Sd</sub> | 4.2        | 569.7       | 4.2        | 563.6       | 3.8        | 627.8       | 4.5        | 528.2       |
|         | H <sub>Fr</sub> /L <sub>Sd</sub> | 3.9        | 603.3       | 4.2        | 572.6       | 3.7        | 637.0       | 4.3        | 556.3       |
|         | L <sub>Fr</sub> /H <sub>Sd</sub> | 3.7        | 646.2       | 4.1        | 586.6       | 4.0        | 600.3       | 4.4        | 541.7       |
|         | H <sub>Fr</sub> /H <sub>Sd</sub> | 3.9        | 606.3       | 4.1        | 580.3       | 3.8        | 621.7       | 4.3        | 550.3       |
| Mg      | L <sub>Fr</sub> /L <sub>Sd</sub> | 73.8       | 10.9        | 75.5       | 10.6        | 68.0       | 11.8        | 87.8       | 9.1         |
|         | H <sub>Fr</sub> /L <sub>Sd</sub> | 75.6       | 10.6        | 74.2       | 11.0        | 65.3       | 12.3        | 91.2       | 8.8         |
|         | L <sub>Fr</sub> /H <sub>Sd</sub> | 72.9       | 11.0        | 73.4       | 11.1        | 65.7       | 12.2        | 77.7       | 10.3        |

|    |                                  |       |        |       |        |       |        |       |        |
|----|----------------------------------|-------|--------|-------|--------|-------|--------|-------|--------|
|    | H <sub>Fr</sub> /H <sub>Sd</sub> | 74.4  | 10.8   | 69.8  | 11.7   | 61.6  | 13.0   | 83.8  | 9.5    |
|    | L <sub>Fr</sub> /L <sub>Sd</sub> | 108.8 | 55.1   | 93.6  | 65.7   | 118.0 | 51.2   | 122.4 | 49.6   |
| Fe | H <sub>Fr</sub> /L <sub>Sd</sub> | 96.8  | 62.3   | 103.6 | 65.2   | 113.0 | 54.2   | 143.3 | 43.8   |
|    | L <sub>Fr</sub> /H <sub>Sd</sub> | 63.5  | 95.2   | 77.3  | 91.1   | 135.1 | 50.6   | 117.9 | 50.9   |
|    | H <sub>Fr</sub> /H <sub>Sd</sub> | 91.9  | 65.3   | 76.0  | 79.6   | 124.2 | 48.6   | 195.6 | 31.5   |
|    | L <sub>Fr</sub> /L <sub>Sd</sub> | 15.2  | 105.5  | 15.2  | 106.3  | 7.4   | 243.7  | 6.0   | 266.8  |
| Mn | H <sub>Fr</sub> /L <sub>Sd</sub> | 12.2  | 132.9  | 14.7  | 108.7  | 9.4   | 260.8  | 10.4  | 159.2  |
|    | L <sub>Fr</sub> /H <sub>Sd</sub> | 9.6   | 166.5  | 10.3  | 156.4  | 10.9  | 149.0  | 8.9   | 185.0  |
|    | H <sub>Fr</sub> /H <sub>Sd</sub> | 7.8   | 207.5  | 8.8   | 187.7  | 11.0  | 156.4  | 16.4  | 97.8   |
|    | L <sub>Fr</sub> /L <sub>Sd</sub> | 12.6  | 374.2  | 13.0  | 365.1  | 10.7  | 451.4  | 5.4   | 873.9  |
| Cu | H <sub>Fr</sub> /L <sub>Sd</sub> | 13.1  | 358.5  | 12.4  | 382.2  | 10.5  | 456.4  | 6.6   | 724.6  |
|    | L <sub>Fr</sub> /H <sub>Sd</sub> | 10.3  | 457.9  | 13.0  | 361.9  | 10.9  | 435.5  | 6.0   | 798.3  |
|    | H <sub>Fr</sub> /H <sub>Sd</sub> | 13.2  | 367.3  | 13.9  | 340.1  | 12.3  | 389.7  | 8.5   | 565.1  |
|    | L <sub>Fr</sub> /L <sub>Sd</sub> | 1.0   | 2643.4 | 1.1   | 2523.0 | 1.0   | 2718.5 | 0.6   | 4824.9 |
| Zn | H <sub>Fr</sub> /L <sub>Sd</sub> | 1.0   | 2668.4 | 1.0   | 2813.3 | 0.9   | 3037.9 | 0.7   | 4069.0 |
|    | L <sub>Fr</sub> /H <sub>Sd</sub> | 0.7   | 3720.8 | 1.1   | 2535.4 | 1.2   | 2197.1 | 0.7   | 3923.4 |
|    | H <sub>Fr</sub> /H <sub>Sd</sub> | 0.6   | 4254.2 | 1.1   | 2459.9 | 1.2   | 2244.7 | 1.1   | 2509.8 |

RDI – Recommended Daily Intake for a male adult with a bodyweight of 70 kg according to the World Health Organization (2002); Calculation of RDI is based on a daily intake of 8 g dry weight of seaweed; RDA – Recommended daily allowance based on the established upper limit intake according to National Health and Medical Research Council (2006); Values of RDI and RDA are expressed as mean for summer (Aug 16' + Sep 16'), autumn (Oct 16' + Nov 16'), winter (Jan 17' + Feb 17') and spring (May 17' and Jun 17').
